# Supplementary material for: Evolution of New cis-Regulatory Motifs Required for Cell-Specific Gene Expression in Caenorhabditis
Source: PLoS Genet. 2016 Sep 2;12(9):e1006278. doi: 10.1371/journal.pgen.1006278 (PMC5010242; doi:10.1371/journal.pgen.1006278)
Supplement: S2 Table — The genotype is indicated in the name of the sheet. Gonad size of each individual is given in pixels. Experimental batch is indicated in the "Batch" column. (XLSX) [file pgen.1006278.s010.xlsx]

## Sheet: N2
Individual	Batch	Gonad size	# lin-3 mRNA			lin-3 mRNA counts by single-molecule FISH in the C. angaria replacement experiment
2	1	1322.79	33
3	1	1431.35	16
4	1	1074.01	31
5	1	937.366	30
7	1	1234.39	25
8	1	1001.27	17
9	1	605.313	27
10	1	1447.85	24
11	1	1070.14	32
13	1	784.863	25
14	1	1617.59	32
15	1	2175.07	32
22	1	1408.94	28
24	1	1944.56	23
25	1	941.358	16
26	1	1461.35	24
27	1	1374.83	25
29	1	853.544	21
31	1	661.891	31
32	1	1315.38	30
33	1	1351.15	20
34	1	1375.71	24
35	1	713.927	24
36	1	1394.55	23
42	1	1115.19	18
48	1	947.216	15
49	1	534.72	30
50	1	1581.08	20
52	1	1159.08	35
53	1	1673.12	27
54	1	1116.91	30
55	1	1142.77	19
56	1	526.53	27
57	1	779.442	23
63	1	1226.28	27
66	1	955.067	24
67	1	994.452	25
68	1	1333.77	17
69	1	1351.5	31
70	1	910.058	22
71	1	1368.73	32
73	1	1058.64	34
74	1	832.979	21
75	1	951.904	22
76	1	457.668	24
77	1	887.683	26
78	1	1057.48	17

## Sheet: mf91
Individual	Batch	Gonad size	# lin-3 mRNA
2	1	1132.5	20
3	1	976.176	20
4	1	1100.98	21
9	1	1064.77	20
10	1	1403.73	26
11	1	1084.01	24
1	2	1073.25	35
2	2	1037.7	21
4	2	1286.01	26
5	2	1057.15	17
6	2	844.855	19
7	2	752.122	19
8	2	1302.65	28
9	2	1450.21	27
10	2	1251.57	24
11	2	1286.32	20
12	2	1137.91	27
15	2	1278	27
16	2	1161.26	19
17	2	1184.2	31
18	2	1166.96	25
22	2	1341.95	34
24	2	732.372	28
25	2	1071.5	23
26	2	1020.8	20
32	2	409.365	15
34	2	1072.01	18
35	2	932.183	26
41	2	955.333	29
42	2	794.314	19
43	2	860.514	16
44	2	886.518	19

## Sheet: mf92
Individual	Batch	Gonad size	# lin-3 mRNA
2	1	1680.15	28
3	1	1225.49	27
4	1	1198.7	23
6	1	1333.48	19
7	1	1135.07	24
8	1	1054.9	16
9	1	1221.79	31
13	1	1107.97	19
16	1	1357.16	20
17	1	672.727	15
26	1	1505.68	25
27	1	1147.16	32
30	1	1461.2	28
1	2	715.177	22
2	2	1701.51	22
8	2	1621.32	23
9	2	1252.29	20
10	2	923.297	24
13	2	1360.05	22
14	2	1126.82	17
15	2	1067.42	17
16	2	1234.28	19
17	2	1395.02	26
18	2	1032.83	28
20	2	1104.77	37
21	2	1555.38	18
22	2	963.25	20
23	2	919.29	19
24	2	813.96	21
25	2	1308	21
27	2	941.977	26
28	2	1077.78	29

## Sheet: mf95
Individual	Batch	Gonad size	# lin-3 mRNA
1	1	555.566	17
4	1	1087.2	21
7	1	1032.65	22
8	1	845.982	20
9	1	831.812	10
10	1	855.014	18
12	1	990.765	31
13	1	749.268	12
14	1	821.285	15
15	1	1025.44	12
17	1	709.204	15
18	1	925.743	22
20	1	759.734	9
24	1	767.625	15
30	1	793.511	18
31	1	819.472	16
34	1	868.691	29
37	1	955.157	18
38	1	656.279	18
48	1	969.122	9
57	1	858.913	11
64	1	858.264	13
65	1	959.697	14
66	1	749.319	14
67	1	965.09	17
69	1	795.462	19

## Sheet: CB1417
Individual	Batch	Gonad size	# lin-3 mRNA
5	1	1207.74	8
8	1	884.031	0
9	1	860.299	0
10	1	1353.64	0
11	1	1265.78	0
12	1	1160.04	0
13	1	1201.12	0
16	1	1298.23	3
18	1	972.354	2
19	1	815.527	2
20	1	764.708	0
25	1	1323.18	3
26	1	1381.81	4
28	1	772.504	5
30	1	1381.71	10

## Sheet: Vulval Induction Indexes
Genotype	Number of VPCs induced
	4	3	2	1	0
	Hyper-induction	WT	Hypo-induction
N2	0	130	0	0	0
lin-3(e1417)	0	3	6	16	10
lin-3(mf91)	1	156	1	0	1
lin-3(mf92)	0	106	5*	0	0
lin-3(mf95)	2	39	1*	0	0
lin-3(mf112)	0	45**	0	0	0
*One animal had half of the descendants of P5.p with a vulval fate. Its vulval index was counted as 2.5
**All the animals had P5.p, P6.p and, P7.p induced correctly, however in one animal the vulval morphology in the L4 stage was abnormal
